# Supplementary material for: Mycobacterium tuberculosis Lipoprotein LprG Binds Lipoarabinomannan and Determines Its Cell Envelope Localization to Control Phagolysosomal Fusion
Source: PubMed Central journal article supplement (PMC4214796; doi:10.1371/journal.ppat.1004471), 2014-10-30

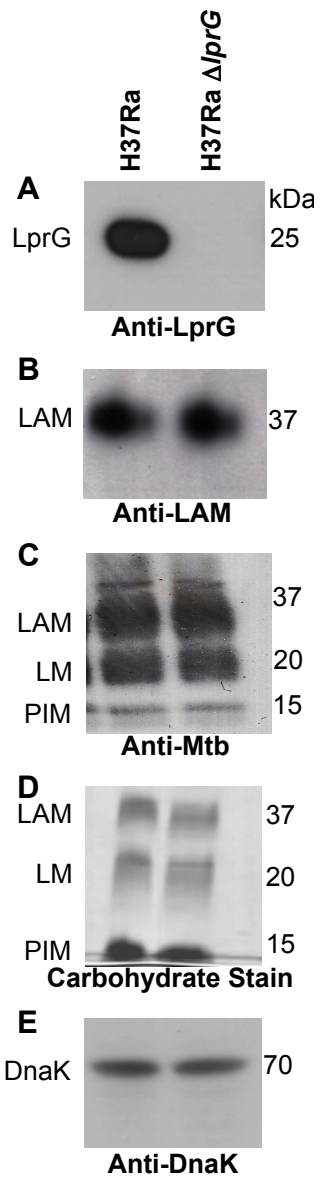

Supplement: ppat.1004471.s001.pdf [file ppat.1004471.s001.pdf]
